# Supplementary material for: Targeting of Silver Cations, Silver-Cystine Complexes, Ag Nanoclusters, and Nanoparticles towards SARS-CoV-2 RNA and Recombinant Virion Proteins
Source: MDPI journal article supplement (doi:10.3390/v14050902), 2022-04-26
Supplement: s1 [file s1]

## Supplementary Data

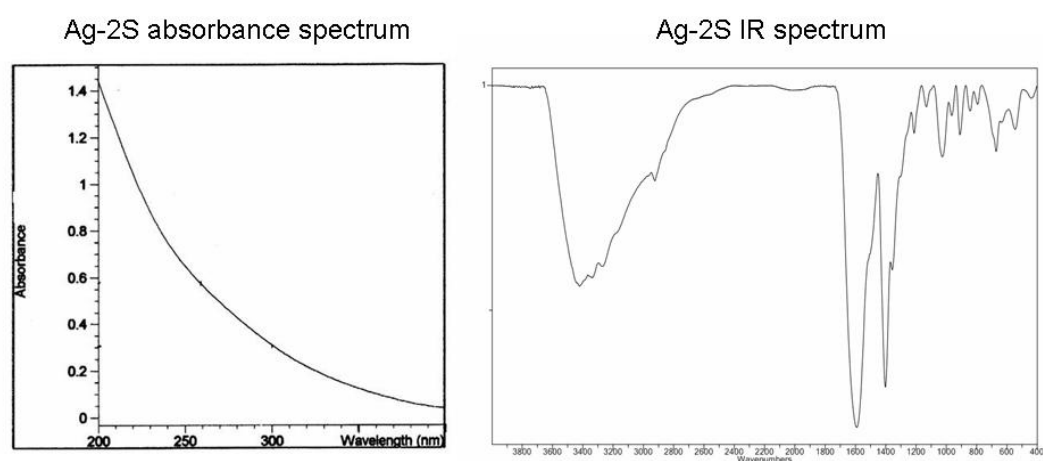

**Figure S1.** Physico-chemical properties of Ag-2S complex: UV absorbance and IR-spectrum.

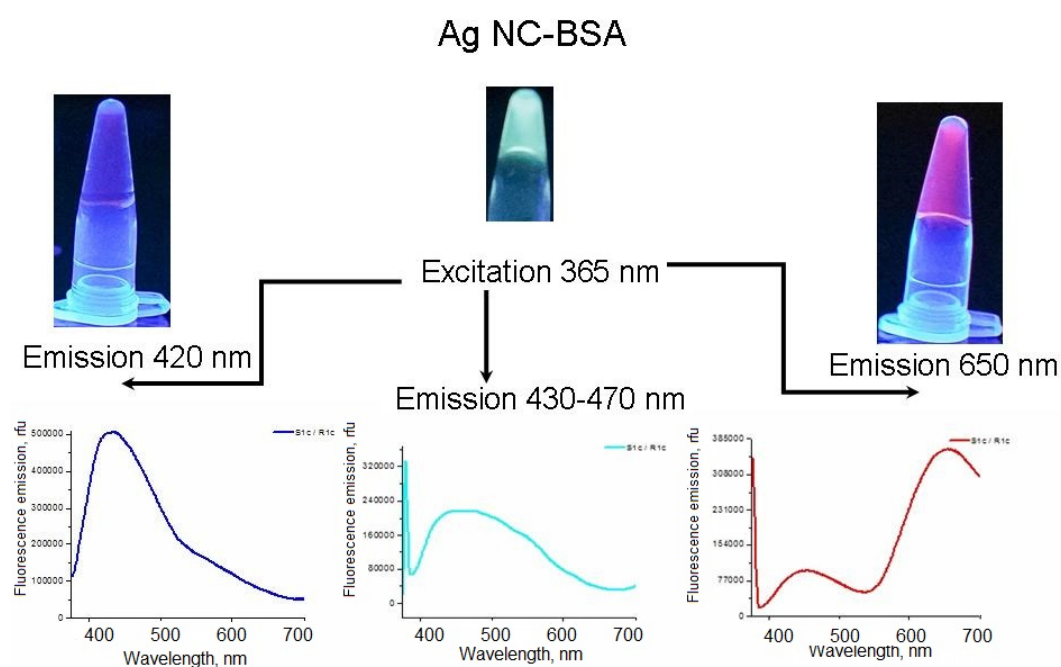

**Figure S2.** Fluorescence emission spectra of Ag NC with BSA.

## Ag NC - IgG

Excitation range 340 -540 nm

Maximal Emission at 560 nm

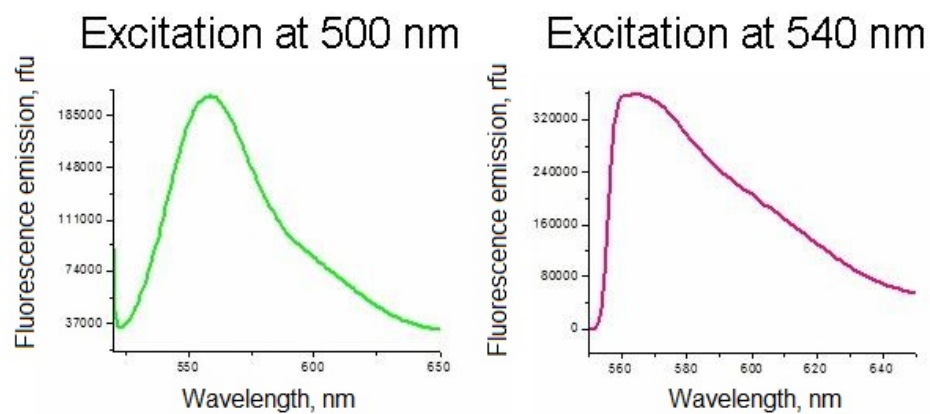

**Figure S3.** Fluorescence emission spectra of Ag NC with IgG.
